# Supplementary material for: Crosstalk of PmCBFs and PmDAMs Based on the Changes of Phytohormones under Seasonal Cold Stress in the Stem of Prunus mume
Source: PubMed Central journal article supplement (PMC5855539; doi:10.3390/ijms19020015), 2018-01-23
Supplement: ijms-19-00015-s001.pdf [file ijms-19-00015-s001.pdf]

## Supplementary Figures

|        |                                                                                                                              |     |
|--------|------------------------------------------------------------------------------------------------------------------------------|-----|
| PmCBF1 | ATGCACAGTTCCTGCTCATTCTTCTGACTCCGTCGACCAG. .... CCCGACTCAAGTTCCTGCTCGACGCCAGCGTCACGACTCTAAGGACTTCTTGGCTCGACGGAGCGATCATATTGCC  | 119 |
| PmCBF2 | ATGGATATGATCTACAGCCAGTCTCTGATTTGGTCTCTCGAAAAACCCGGATAAGTCGCTGTTTCGGAGCCGACGCTCACGGCCGGCGAGCTTCTTCAGATGAGGGCGTCTACATGGCC      | 125 |
| PmCBF3 | .....                                                                                                                        | 0   |
| PmCBF4 | ..... ATGCAGTGTCTGAACTTCCGACTCCGTCGACCAG. .... CCCGACTCAAGTTCCTGCTCGACGCCAGCGTCACGACTCGGGGGCTTCTTGGCTCGACGGGAAGTCTATATTGCC   | 113 |
| PmCBF5 | ATGGACAGCATCTCTCTCAGCTTCTGACTCGGGCCGACAG. .... CCAAGTCGAGTTCGCTCCTCGACGCCAGCGTCACGACTCGGCTCAGCAGCTCG. .... GAGCTCATACTGGC    | 107 |
| PmCBF6 | .....                                                                                                                        | 0   |
|        |                                                                                                                              |     |
| PmCBF1 | GTCGAGCCACCAAGAAGCGAGTGGAGGAGGGTTTCAAGGAGACAGGCACCTGTTTATAGGGCGTGTGAGGAGGAAACAATGACAAGTGGTGTGAAATGAGAGAGCCCAAGAAGA           | 244 |
| PmCBF2 | GTCAGCTCCCGCAAGAGCGCGGGAGGAGGGTTTCAAGGAGACAGGCACCTGTTTATAGGGCGTGTGAGGAGGAAACAACAACAAGTGGTGTGAAATGAGAGAGCCCAACAACA            | 250 |
| PmCBF3 | .....                                                                                                                        | 0   |
| PmCBF4 | GTCAGCCGCGCAAGAAGCGAGCGGGAGGAGGGTTTCAAGGAGACAGGCACCTGTTTATAGGGCGTGTGAGGAGGAAACAATGACAAGTGGTGTGAAATGAGAGAGCCCAACAAGA          | 238 |
| PmCBF5 | GTCGAGCAGCCGAAGAAGCGCGGGAGGAGGGTTTCAAGGAGACAGGCACCTGTTTATAGGGCGTGTGAGGAGGAAACAACAACAAGTGGTGTGAAATGAGAGAGCCCAACAACA           | 232 |
| PmCBF6 | .....                                                                                                                        | 0   |
|        |                                                                                                                              |     |
| PmCBF1 | CGAAGTCCAGGATATGGCTCGGACTTATCCGACGGCGGAGATGGCTGCTGTCACATGACGCTGGCGGATGGCATTAGAGGGAAGCTTGCTGCTCAACTTCGCTGACTCCGCTGGAGG        | 369 |
| PmCBF2 | AGAAGCCAGGACATGGCTCGGACTTATCCGACAGTGTATGGCGCTGCTGCCATGATGCTGCTGATTGGCGTTTGGGGGAAGCTTGCTGCTCAACTTCGCTGACTCCGCTGGCGG           | 375 |
| PmCBF3 | .....                                                                                                                        | 0   |
| PmCBF4 | ACAGTCCAGGATATGGCTCGGACTTATCCGACGGCTGAGATGGCTGCTGTCACATGACGCTGGCGGATGGCATTAGAGGGAAGCTTGCTGCTCAACTTCGCTGACTCCGCTGGAGG         | 364 |
| PmCBF5 | AGAAGTCCGGATATGGCTCGGACTTATCCGACGGCTGAGATGGCTGCTGTCACATGACGCTGGCGGATGGCATTAGAGGGAAGCTTGCTGCTCAACTTCGCTGACTCCGCTGGAGG         | 357 |
| PmCBF6 | .....                                                                                                                        | 84  |
|        |                                                                                                                              |     |
| PmCBF1 | CTGCCGCTGCTGCTCCATGGATGCAATGGATATTCCGAGAGCGCCCTCCGAGGACGTCAGGGGTTTGGCGGTTGAGGATTTGGTGGAGTGTCCAGCAGCAGCAGTGTGAGAAGGAGAGAT     | 494 |
| PmCBF2 | CTGCCGCTGCTGCTCCATGGATGCAATGGATATTCCGAGAGCGCCCTCCGAGGACGTCAGGGGTTTGGCGGTTGAGGATTTGGTGGAGTGTCCAGCAGCAGCAGTGTGAGAAGGAGAGAT     | 485 |
| PmCBF3 | CTGCCGCTGCTGCTCCATGGATGCAATGGATATTCCGAGAGCGCCCTCCGAGGACGTCAGGGGTTTGGCGGTTGAGGATTTGGTGGAGTGTCCAGCAGCAGCAGTGTGAGAAGGAGAGAT     | 209 |
| PmCBF4 | L P V P A S N D A D I R R A A S E A A E G F R P V E F G G V S S S S S S D E K E S M                                          | 488 |
| PmCBF5 | CTGCCGCTGCTGCTCCATGGATGCAATGGATATTCCGAGAGCGCCCTCCGAGGACGTCAGGGGTTTGGCGGTTGAGGATTTGGTGGAGTGTCCAGCAGCAGCAGTGTGAGAAGGAGAGAT     | 482 |
| PmCBF6 | L P V A A S N D S T D I Q R A A E A A E G F R P V E F G G V F S D S S D E K E R T                                            | 209 |
|        |                                                                                                                              |     |
| PmCBF1 | GGTGGTGCAGGTGGAAGAGAAGAAGAAGGGTAGTGTGAATATGG. . . AAAGAAGCAGAAGCTTGAGCTTGCTCTATTGGGATGAGGAGGAAGTGTGGACATGCCAAGGATGCTTGATCACA | 616 |
| PmCBF2 | GGCGGTGTGACCGAGGAG. .... AAGGGTGTGAGAAATGG. . . AGGGAAGCAGCA. .... ACTTTTATTTGGACGAGGAGAAATATTTGAGATGCCAAGGTTGCTTGATGACA     | 592 |
| PmCBF3 | GGTGGTGCAGGTGGAAGAGAAGAAGAAGGGTAGTGTGAATATGG. . . AAAGAAGCAGAAGCTTGAGCTTGCTCTATTGGGATGAGGAGGAAGTGTGGACATGCCAAGGATGCTTGATCACA | 331 |
| PmCBF4 | GGTGGTGCAGGTGGAAGAGAAGAAGAAGGGTAGTGTGAATATGG. . . AAAGAAGCAGAAGCTTGAGCTTGCTCTATTGGGATGAGGAGGAAGCTTTGACATGCCCAGGTTGCTTGATCACA | 610 |
| PmCBF5 | GGTGGTGCAGGTGGAAGAGAAGAAGAAGGGTAGTGTGAATATGG. . . AAAGAAGCAGAAGCTTGAGCTTGCTCTATTGGGATGAGGAGGAAGCTTTGACATGCCCAGGTTGCTTGATCACA | 607 |
| PmCBF6 | GGTGGTGCAGGTGGAAGAGAAGAAGAAGGGTAGTGTGAATATGG. . . AAAGAAGCAGAAGCTTGAGCTTGCTCTATTGGGATGAGGAGGAAGTGTGGACATGCCAAGGATGCTTGATCACA | 334 |
|        |                                                                                                                              |     |
| PmCBF1 | TGGCTCAAGGCCCTTCTTTCTCCACCTCAATGCTTAGTGGCTACAT. . . TTGGGATGACATGGGAACCGATGCTGATGCAATGTGGAGTTTCTCAATTAA                      | 720 |
| PmCBF2 | TGGCTCAAGGCCCTTCTTTCTCCACCTCAATGCTTAGTGGCTACAT. . . TTGGGATGACATGGGAACCGATGCTGATGCAATGTGGAGTTTCTCAATTAA                      | 699 |
| PmCBF3 | TGGCTCAAGGCCCTTCTTTCTCCACCTCAATGCTTAGTGGCTACAT. . . TTGGGATGACATGGGAACCGATGCTGATGCAATGTGGAGTTTCTCAATTAA                      | 438 |
| PmCBF4 | TGGCTCAAGGCCCTTCTTTCTCCACCTCAATGCTTAGTGGCTACAT. . . TTGGGATGACATGGGAACCGATGCTGATGCAATGTGGAGTTTCTCAATTAA                      | 717 |
| PmCBF5 | TGGCTCAAGGCCCTTCTTTCTCCACCTCAATGCTTAGTGGCTACAT. . . TTGGGATGACATGGGAACCGATGCTGATGCAATGTGGAGTTTCTCAATTAA                      | 714 |
| PmCBF6 | TGGCTCAAGGCCCTTCTTTCTCCACCTCAATGCTTAGTGGCTACAT. . . TTGGGATGACATGGGAACCGATGCTGATGCAATGTGGAGTTTCTCAATTAA                      | 441 |

Supplementary Figure S1. The CDS and corresponding amino acid sequences of *PmCBFs*. The AP2/ERF domain was indicated in red rectangular region.

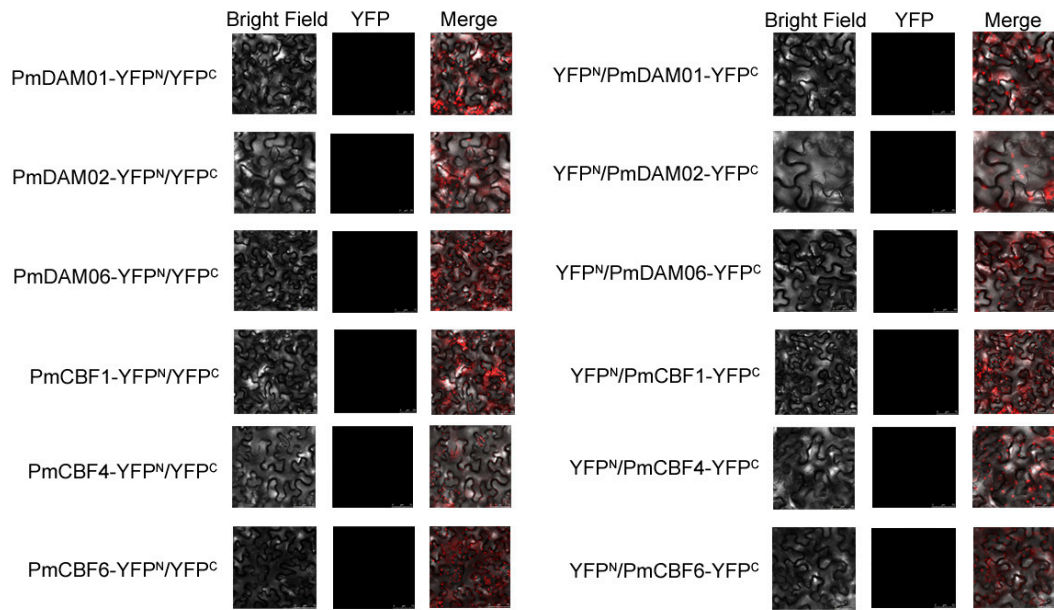

**Supplementary Figure S2. Control experiments of BiFC assays.** In every interactions, the two proteins were fused with either the C or N terminus of yellow fluorescent protein (YFP; designated as YFP<sup>C</sup> or YFP<sup>N</sup>, respectively). Different combinations of the fused constructs were co-transformed into leaf cell of *N. benthamiana*, and then the cells were observed by confocal microscopy. There was no interaction between YFP<sup>N</sup>/YFP<sup>C</sup> and PmDAMs-YFP<sup>C</sup>/PmDAMs-YFP<sup>N</sup> and no interaction between YFP<sup>N</sup>/YFP<sup>C</sup> and PmCBFs-YFP<sup>C</sup>/PmCBFs-YFP<sup>N</sup>. Bright field and YFP were excited at 514 nm. The red fluorescent showed the chloroplast position.

### Supplementary Tables

**Supplementary Table S1.** *PmCBFs* identified in *P. mune* genome database.

| Name          | Gene ID  | Length | locus                 |
|---------------|----------|--------|-----------------------|
| <i>PmCBF1</i> | Pm023769 | 987    | Pa7:8068777:8070753:+ |
| <i>PmCBF2</i> | Pm023772 | 678    | Pa7:8098394:8099071:+ |
| <i>PmCBF3</i> | Pm023773 | 438    | Pa7:8100584:8101021:+ |
| <i>PmCBF4</i> | Pm023775 | 717    | Pa7:8104198:8104914:+ |
| <i>PmCBF5</i> | Pm023777 | 795    | Pa7:8114725:8115519:+ |
| <i>PmCBF6</i> | Pm027913 | 441    | C5001875:1668:2108:-  |

**Supplementary Table S2.** Primers used for cloning.

| Gene | Forward primer | Reverse primer | Annealing temperature |
|------|----------------|----------------|-----------------------|
|      |                |                |                       |

|                |                             |                                  |       |
|----------------|-----------------------------|----------------------------------|-------|
| <i>PmCBF1</i>  | 5' ATGCACAGGTTCTTGTCTGAT 3' | 5' TTAATTGGAGAAACTCCACAA 3'      | 56 °C |
| <i>PmCBF2</i>  | 5' ATGGATATGATCTACAGCCAG 3' | 5' TCAAATAGAAAACTCCACAG 3'       | 53 °C |
| <i>PmCBF3</i>  | 5' ATGGCTGCTCGTGCCCATGAC 3' | 5' TTAAATGGAGAAATTCCACAATTTGA 3' | 64 °C |
| <i>PmCBF4</i>  | 5' ATGGACGTGTCTGAACTTTCC 3' | 5' TTAAATGGAGAAACTCCACAA 3'      | 57 °C |
| <i>PmCBF5</i>  | 5' ATGGACACGATCTTCTCTCAG 3' | 5' TCAGATAGAGAAACTCCACAA 3'      | 56 °C |
| <i>PmCBF6</i>  | 5' ATGGCTGCTCGTGCCCATGAC 3' | 5' TCAGATAGAGAAACTCCACAA 3'      | 64 °C |
| <i>PmDAM01</i> | 5'ATGAAAATGATGAGGGAGAAG3    | 5' TTATGGAAGCCCCAGTTTGAG3'       | 52 °C |
|                | ,                           |                                  |       |
| <i>PmDAM02</i> | 5'ATGGTGAAGACGATGAGGAAG3    | 5' TTAGGGAAGCCCCAGTTTGAG3'       | 56 °C |
|                | ,                           |                                  |       |
| <i>PmDAM03</i> | 5'ATGATGAGGAAGAAGATCAAG3    | 5' TTAAGGAAGCCCCAGTTCGAG3'       | 51 °C |
|                | ,                           |                                  |       |
| <i>PmDAM04</i> | 5'ATGGTGAAAATGATGAGGGAG3'   | 5' TTAGGAACGCCCCAGTTTGAG3'       | 54 °C |
| <i>PmDAM05</i> | 5'ATGATGAATAAGATCAAGATC3'   | 5' TTAACGCCCCAGTTTGAGAGA3'       | 47 °C |
| <i>PmDAM06</i> | 5'ATGGTGAAAATGATGAGGGAG3'   | 5' CTAGGGAAGCCCCAGTTTGAG3'       | 59 °C |

**Supplementary Table S3.** Primer used for real-time quantitative RT-PCR.

| Gene           | Forward primer               | Reverse primer              |
|----------------|------------------------------|-----------------------------|
| <i>PmPP2A</i>  | 5'AGGGTTCGGCTCGCAATAATAGA3'  | 5'TGTTAGCAGCAGCATCACGAAT3'  |
| <i>PmCBF1</i>  | 5' ATGCACAGGTTCTTGTCTGAT 3'  | 5' CGTCGGACCAAGAAGTCCTTA 3' |
| <i>PmCBF2</i>  | 5' AAAACCCGGATAAGTCGTCGT 3'  | 5' ATGTCCTGGCCTTCTTGTGT 3'  |
| <i>PmCBF3</i>  | 5' TGCATCAATTTTCGCTGATTCC 3' | 5' CGCTGCACACTCCACCAAATT 3' |
| <i>PmCBF4</i>  | 5' ACGTGTCTGAACTTTCCGACT 3'  | 5' GCTTGACGCCAATATGACTTC 3' |
| <i>PmCBF5</i>  | 5' TTCTCTCAGCTTTCTGACTCG 3'  | 5' AACCGGATGCCTCGTCTCTTT 3' |
| <i>PmCBF6</i>  | 5' TCCGGTTGGAGGCTGCCGGTG 3'  | 5' TTCCCATATCTACAATAGCCT 3' |
| <i>PmDAM01</i> | 5'AGTATGAAGGATGTTATTCAA3'    | 5'CTTAAGTTCCTTGCTCAATCT3'   |
| <i>PmDAM02</i> | 5'AACCAGCTACGGCAGAGGATG3'    | 5'AGATTCAGATGACATGCCTT3'    |
| <i>PmDAM03</i> | 5'TCGGATTGAGCAAGGAACTGG3'    | 5'CATTCTCAGTTCTTCCTTTGT3'   |
| <i>PmDAM04</i> | 5'ACCCTTGTCGGTGTGATGGAA3'    | 5'ATCACCATCTGATTGTTGCCT3'   |
| <i>PmDAM05</i> | 5'AGGCTGAATAATAATATTGAA3'    | 5'TTAACGCCCCAGTTTGAGAGA3'   |
| <i>PmDAM06</i> | 5'AACCAACAACCAGTTAAGGCATA3'  | 5'CAATTACGGCAGATTCAGATGA3'  |

**Supplementary Table S4.** Primer used in PCR reactions for subcellular localization assessments.

| Gene          | Sequence 5'-3'                            |
|---------------|-------------------------------------------|
| 1300-PmCBF1-F | AGGGGCCCCGGGGTTCGACATGAAAATGATGAGGGAGAAG  |
| 1300-PmCBF1-R | GGTACCGGATCCACTAGTTGGAAGCCCCAGTTTGAG      |
| 1300-PmCBF2-F | AGGGGCCCCGGGGTTCGACATGGTGAAGACGATGAGGAAG  |
| 1300-PmCBF2-R | GGTACCGGATCCACTAGTGGGAAGCCCCAGTTTGAG      |
| 1300-PmCBF3-F | AGGGGCCCCGGGGTTCGACATGATGAGGAAGAAGATCAAG  |
| 1300-PmCBF3-R | GGTACCGGATCCACTAGTAGGAAGCCCCAGTTTCGAG     |
| 1300-PmCBF4-F | AGGGGCCCCGGGGTTCGACATGGTGAATAATGATGAGGGAG |
| 1300-PmCBF4-R | GGTACCGGATCCACTAGTGGAAACGCCCCAGTTTGAG     |
| 1300-PmCBF5-F | AGGGGCCCCGGGGTTCGACATGATGAATAAGATCAAGATC  |
| 1300-PmCBF5-R | GGTACCGGATCCACTAGTACGCCCCAGTTTGAGAGA      |
| 1300-PmCBF6-F | AGGGGCCCCGGGGTTCGACATGGTGAATAATGATGAGGGAG |
| 1300-PmCBF6-R | GGTACCGGATCCACTAGTGGGAAGCCCCAGTTTGAG      |

**Supplementary Table S5.** Primer used in PCR reactions for yeast two-hybrid assays.

| Gene         | Sequence 5'-3'                         | vector |
|--------------|----------------------------------------|--------|
| BK-PmCBF1-F  | CATGGAGGCCGAATTCATGCACAGGTTCTTGTCTGAT  | pGBKT7 |
| BK-PmCBF1-R  | GCAGGTCGACGGATCCTTAATTGGAGAACTCCACAA   |        |
| BK-PmDAM01-F | CATGGAGGCCGAATTCATGAAAATGATGAGGGAGAAG  | pGBKT7 |
| BK-PmDAM01-R | GCAGGTCGACGGATCCTTATGGAAGCCCCAGTTTGAG  |        |
| BK-PmDAM02-F | CATGGAGGCCGAATTCATGGTGAAGACGATGAGGAAG  | pGBKT7 |
| BK-PmDAM02-R | GCAGGTCGACGGATCCTTAGGGAAGCCCCAGTTTGAG  |        |
| BK-PmDAM03-F | CATGGAGGCCGAATTCATGATGAGGAAGAAGATCAAG  | pGBKT7 |
| BK-PmDAM03-R | GCAGGTCGACGGATCCTTAAGGAAGCCCCAGTTTCGAG |        |
| BK-PmDAM04-F | CATGGAGGCCGAATTCATGGTGAATAATGATGAGGGAG | pGBKT7 |
| BK-PmDAM04-R | GCAGGTCGACGGATCCTTAGGAACGCCCCAGTTTGAG  |        |
| BK-PmDAM05-F | CATGGAGGCCGAATTCATGATGAATAAGATCAAGATC  | pGBKT7 |
| BK-PmDAM05-R | GCAGGTCGACGGATCCTAACGCCCCAGTTTGAGAGA   |        |
| BK-PmDAM06-F | CATGGAGGCCGAATTCATGGTGAATAATGATGAGGGAG | pGBKT7 |
| BK-PmDAM06-R | GCAGGTCGACGGATCCCTAGGGAAGCCCCAGTTTGAG  |        |
| AD-PmCBF1-F  | GGAGGCCAGTGAATTCATGCACAGGTTCTTGTCTGAT  | pGADT7 |
| AD-PmCBF1-R  | CGAGCTCGATGGATCCTTAATTGGAGAACTCCACAA   |        |
| AD-PmDAM01-F | GGAGGCCAGTGAATTCATGAAAATGATGAGGGAGAAG  | pGADT7 |
| AD-PmDAM01-R | CGAGCTCGATGGATCCTTATGGAAGCCCCAGTTTGAG  |        |
| AD-PmDAM02-F | GGAGGCCAGTGAATTCATGGTGAAGACGATGAGGAAG  | pGADT7 |
| AD-PmDAM02-R | CGAGCTCGATGGATCCTTAGGGAAGCCCCAGTTTGAG  |        |
| AD-PmDAM03-F | GGAGGCCAGTGAATTCATGATGAGGAAGAAGATCAAG  | pGADT7 |
| AD-PmDAM03-R | CGAGCTCGATGGATCCTTAAGGAAGCCCCAGTTTCGAG |        |
| AD-PmDAM04-F | GGAGGCCAGTGAATTCATGGTGAATAATGATGAGGGAG | pGADT7 |
| AD-PmDAM04-R | CGAGCTCGATGGATCCTTAGGAACGCCCCAGTTTGAG  |        |
| AD-PmDAM05-F | GGAGGCCAGTGAATTCATGATGAATAAGATCAAGATC  | pGADT7 |

|              |                                         |        |
|--------------|-----------------------------------------|--------|
| AD-PmDAM05-R | CGAGCTCGATGGATCCTTAACGCCCCAGTTTGAGAGA   |        |
| AD-PmDAM06-F | GGAGGCCAGTGAATTCATGGTGA AAAATGATGAGGGAG | pGADT7 |
| AD-PmDAM06-R | CGAGCTCGATGGATCCCTAGGGAAGCCCCAGTTTGAG   |        |

**Supplementary Table S6.** Primer used in PCR reactions for BiFC assays.

| Gene           | Sequence 5'-3'                           |
|----------------|------------------------------------------|
| BiFC-PmCBF1-F  | TGCAGGGAGGAGGATCCATGCACAGGTTCTTGTCTGAT   |
| BiFC-PmCBF1-R  | CGGTGCACTAGTGTGCGACATTGGAGAACTCCACAA     |
| BiFC-PmDAM01-F | TGCAGGGAGGAGGATCCATGAAAATGATGAGGGAGAAG   |
| BiFC-PmDAM01-R | CGGTGCACTAGTGTGCGACTGGAAGCCCCAGTTTGAG    |
| BiFC-PmDAM02-F | TGCAGGGAGGAGGATCCATGGTGAAGACGATGAGGAAG   |
| BiFC-PmDAM02-R | CGGTGCACTAGTGTGCGACGGGAAGCCCCAGTTTGAG    |
| BiFC-PmDAM03-F | TGCAGGGAGGAGGATCCATGATGAGGAAGAAGATCAAG   |
| BiFC-PmDAM03-R | CGGTGCACTAGTGTGCGACAGGAAGCCCCAGTTGAG     |
| BiFC-PmDAM04-F | TGCAGGGAGGAGGATCCATGGTGA AAAATGATGAGGGAG |
| BiFC-PmDAM04-R | CGGTGCACTAGTGTGCGACGGAACGCCCCAGTTTGAG    |
| BiFC-PmDAM05-F | TGCAGGGAGGAGGATCCATGATGAATAAGATCAAGATC   |
| BiFC-PmDAM05-R | CGGTGCACTAGTGTGCGACACGCCCCAGTTTGAGAGA    |
| BiFC-PmDAM06-F | TGCAGGGAGGAGGATCCATGGTGA AAAATGATGAGGGAG |
| BiFC-PmDAM06-R | CGGTGCACTAGTGTGCGACGGGAAGCCCCAGTTTGAG    |

## 1 Supplementary Data

**Supplementary Data S1.** The CDS sequences of six *PmCBFs* identified in *P. mune* genome database.

>PmCBF1

ATGCACAGGTTCTTGTCTGATTTTTCTGACTCCGTCGACCAGCCCGACTCAAGTTCGTT  
 GTCCGACGCCAGCGTCACGACTCTAAGGACTTCTTGGTCCGACGAGGACGTCATATTG  
 GCGTCGAGCCGACCAAAGAAGCGAGCTGGGAGGAGGGTTTTCAAGGAGACCAGGCA  
 CCCTGTTTATAGGGGCGTGAGGAGGAGGAACAATGACAAGTGGGTGTGTGAAATGAG  
 AGAGCCCAAGAAGACGAAGTCCAGGATATGGCTCGGGACTTATCCGACGGCGGAGAT  
 GGCTGCTCGTGACATGACGTGGCGGCATTGGCATTAGAGGGAAGCTTGCCTGCCTC  
 AACTTCGCTGACTCCGCGTGGAGGCTGCCCGTGCCTGCTTCCATGGATGCAATGGATA  
 TTCGAGAGCGGCCCGCCGAGGAGGCTGAGGGGTTTAGGCCGGTGGAGTTTGGTGGAG  
 TGTCAGCAGCAGCAGTATGAGAAGGAGAGTATGGTGGTGCAGGTGGAAGAGAAG  
 AAGAAGAAGGGTAGTGTGAATATGGAAGAAGCAGAAGCTTGAGCTTGTCTATTGG  
 GATGAGGAGGAAGTGTGGACATGCCAAGGTTGCTTGATCACATGGCTCAAGGCCTTC  
 TTCTTTCTCCACCTCAATGCTTAGGTGGCGACATTTGGGATGACATGGGAACCGATGCT

GATGTCTGAATTGTGGATGATTGTGGAGTTTGGTGGAGTGTCCAGCAGCAGCAGTGATG  
AGAAGGAGAGTATGGTGGTGCAGGTGGAAGAGAAGAAGAAGGGTAGTGTGAAT  
ATGGAAGAAGCAGAAGCTTGAGCTTGCCTATTGGGATGAGGAGGAAGTGTGGAC  
ATGCCAAGGTTGCTTGATCACATGGCTCAAGGCCTTCTTCTTTCTCCACCTCAATGCTT  
AGGTGGCGACATTTGGGATGACATGGGAACCGATGCTGATGTCTGAATTGTGGAGTTTC  
TCCAATTAA

>PmCBF2

ATGGATATGATCTACAGCCAGGTCTCTGATTTGGCTTCTCTGGAAAACCCGGATAAGTC  
GTCGTTTTTCGGACGCCAGCGTCACGGCCCCGGCGAGCTTCTCTTTCAGATGAGGCGGTC  
ATACTGGCGTCCAGCTGCCCCGAAAAGGCGGGCGGGGAGGAGGGTTTCAAGGAGAC  
CAGGCACCCGTTTATAGGGGTGTGAGGAGGAGGAACAACAACAAGTGGGTGTGTG  
AGCTGAGAGAGCCCAACAACAAGAAGGCCAGGACATGGCTCGGGACTTATCCGACA  
GCTGATATGGCGGCTCGTGCCCATGATGTCGCTGCATTGGCGTTTAGGGGGAAGCTTG  
CCTGCCTCAACTTTGCTGACTCGGCTTGCCGCTGCCCGTCCCGGCCTCCACCGATGC  
CGCGGGGATTAGGAGGGCGGCCACCGAGGCGGAGGATGGTGGTGTATTATGAGAAGG  
AGAGTAAGGCGGTGGTGAGCGAGGAGAAGGGTTGTGTAGAAATGGAGGGAAGCAGC  
AACTTTTTTTTATTTGGACGAGGAGGAAATATTTGAGATGCCAAGGTTGCTTGATGACAT  
GGCTGAAGGGCTTATGCTTTGTCCACCTCAATGTTTAGATGGCCACATGGATTGGAATG  
ACGTGGAAACTGATGATGATTTGAAACTGTGGAGTTTTTTCTATTGA

>PmCBF3

ATGGCTGCTCGTGCCCATGACGTGGCGGCATTGGCGTTTAGAGGGAAGCTTGCCTGCA  
TCAATTTTCGCTGATTCCGCGTGGAGGCTACCTGTGCCGGCTTCCATGGATAACCATGGAT  
ATTCGGAGAGCTGCCGCGGAAGCAGCGGAGGGGTTTAGGCCGGCGGAATTTGGTGGGA  
GTGTGCAGCGGCAGCAGTGATGAGAAGGAGAGAATGGTGGTGCAGGTGGAAGAGAA  
GAACAAGAAGGGTAGTGTGAACTTGAAAGAAGCAGAAGCTTGAGTTTGCCTATTG  
GGATGAGGAGGAAGTGTGACATGCCAGGTTGCTTCATGACATGGCTGAAGGGCTT  
CTTCTTTCTCCATCGCAATGCTTAGGTGGCTACATGAATTTGGATGACATGGGAACCGA  
TGCTGATGTCAAATTGTGGAATTTCTCCATTAA

>PmCBF4

ATGGACGTGTCTGAACTTTCCGACTCGGTCCGACCAGCCCGAGTCGAGTTCTTTGTCCG  
ACGCCAGCGTCACGACTCGGGGGCCTTCTTTGTCGGACGGGGAAGTCATATTGGCGTC  
AAGCCGGCCGAAGAAGCGAGCCGGGAGGAGGGTTTTCAAGGAGACGAGGCACCCG  
GTTTATAGGGGTGTGAGGAGGAGGAACAATGACAAGTGGGTTTGTGAAATGAGAGAG  
CCCAACAAGAAGAAGTCCAGGATATGGCTCGGGACTTATCCGACGGCTGAGATGGCT

GCTCGTGCCCATGACGTGGCGGCATTGGCGTTTAGAGGGAAGCTTGCCTGCCTCAACT  
TTGCTGACTCCGCGTGGAGGCTGCCAGTGCCGGCTTCCATGGATCCCATGGATATTCG  
AAGGGCGGCCGCGGAGGCAGCTGAGGGGTTTAGGCCGAGGAGTTTGGTGGAGTGT  
GCAACGGCAGCAGTGATGAGAAGGAGAGAATGGTGGTGCAGGTGGAAGAGGAGAA  
CAAGAAGGGTAGTGTGAACTTGGAAAGAAGCAGAAGCTTGAGCTTGTCTATTGGGA  
TGAGGAGGAAGCGTTTGACATGCCAGGTTGCTTCATGACATGGCTGAAGGGCTTCTT  
CTTTCTCCACCGCAACCCCTTAGGCAGCGACACGAATTTGGATGACATGGGTACCGATG  
CTGATATCAAATTGTGGAGTTTCTCCATTAA

>PmCBF5

ATGGACACGATCTTCTCTCAGCTTTCTGACTCGGCCGACCAGCCCAAGTCGAGTTCGT  
CATCCGACGCAAGCGTGACCACCTACGCACTTCGGACGTCATACTGGCGTCGAGCA  
GGCCGAAGAAGCGCGCGGGAAGGAGGGTTTTCAAAGAGACGAGGCATCCGGTTTAT  
AGGGGTGTGAGGAGTAGGGACAACAACAAGTGGGTGTGTGAGTTGAGACAGCCCAA  
CAAGAAGAAGTCCGGGATTTGGCTCGGGACCTATCCTACGGCTGAGATGGCTGCTCGT  
GCCCATGACGTGGCGGCATTGGCTTTTAAAGGGAAGCTTGCCTGCCTCAACTTTGCTG  
ACTCCGGTTGGAGGCTGCCGGTGGCGGCATCCATGGACTCCATGGATATCCAGAGGGC  
AGCTGACGAGGGCGCCGGAGGGGTGCGGGCCGCGGGGCTGCCGGTGGCGGCATCCA  
TGGACTCCATGGATATCCAGAGGGCAGCTGCGGAGGCCGCTGAAGGGTTCAGGCCAG  
TGGAGTTCGGTGGAGTTTCCAGCGACAGCAGTGATGAGAAGGAGAGAACGGTTGTGG  
TGGAAGAGAAGAAGAAGAAGCAGGCTATTGTAGATATGGGAAAAAGCTGCAGCAGA  
TTAAACTTGTTTTATTTCGGATGAGGAGGAAATGTTTGATATGCCAAGGTTGATTGACGA  
CATGGCTGAAGGGCTTCTTCTTTCTCCACCCCAATGCTTAGCTGGCTACTTGAATTGGG  
ATGACATGGAAACTGAATCTGATCCCAAGTTGTGGAGTTTCTCTATCTGA

>PmCBF6

ATGGCTGCTCGTGCCCATGACGTGGCGGCATTGGCTTTTAAAGGGAAGCTTGCCTGCC  
TCAACTTTGCTGACTCCGGTTGGAGGCTGCCGGTGGCGGCATCCATGGACTCCATGGA  
TATCCAGAGGGCAGCTGCGGAGGCCGCTGAAGGGTTCAGGCCAGTGGAGTTCGGTGG  
AGTTTCCAGCGACAGCAGTGATGAGAAGGAGAGAACGGTTGTGGTGAAGAGAAGA  
AGAAGAAGCAGGCTATTGTAGATATGGGAAAAAGCTGCAGCAGATTAAACTTGTTTTA  
TTCGGATGAGGAGGAAATGTTTGATATGCCAAGGTTGATTGACGACATGGCTGAAGGG  
CTTCTTCTTTCTCCACCCCAATGCTTAGCTGGCTACTTGAATTGGGATGACATGGAAAC  
TGAATCTGATCCCAAGTTGTGGAGTTTCTCTATCTGA

**Supplementary Data S2.** The cDNA sequences of six *PmCBFs* and six *PmDAMs* cloned from *P.*

*mume* 'Sanlun Yudie'.

> PmCBF1

ATGCACAGGTTCTTGTCTCATTCTGACTCCGTCGACCAGCCCGACTCAAGTTCGTT  
GTCCGACGCCAGCGTCACGACTCTAAGGACTTCTTGGTCCGACGAGGACGTCATATTG  
GCGTCGAGCCGACCAAAGAAGCGAGCTGGGAGGAGGGTTTTCAAGGAGACCAGGCA  
CCCTGTTTATAGGGGCGTGAGGAGGAGGAACAATGACAAGTGGGTGTGTGAAATGAG  
AGAGCCCAAGAAGACGAAGTCCAGGATATGGCTCGGGACTTATCCGACGGCGGAGAT  
GGCTGCTCGTGCACATGACGTGGCGGCATTGGCATTAGAGGGAAGCTTGCCTGCCTC  
AACTTCGCTGACTCCGCGTGGAGGCTGCCCGTGCCTGCTTCCATGGATGCAATGGATA  
TTCGGAGAGCGGCCTCCGAGGCAGCTGAGGGGTTTAGGCCGGTGGAGTTTGGTGGAG  
TGTCCAGCAGCAGCAGTGATGAGAAGGAGAGTATGGTGGTGCAGGTGGAAGAGAAG  
AAGAAGAAGGGTAGTGTGAATATGGAAGAAGCAGAAGCTTGAGCTTGTCTATTGG  
GATGAGGAGGAAGTGTGGACATGCCAAGGATGCTTGATCACATGGCTCAAGGCCTT  
CTTCTTTCTCCACCTCAATGCTTAGGTGGCTACATTTGGGATGACATGGGAACCGATGC  
TGATGTCGAATTGTGGAGTTTCTCCAATTAA

> PmCBF2

ATGGATATGATCTACAGCCAGGTCTCTGATTTGGCTTCTCTGGAAAACCCGGATAAGTC  
GTCGTTTTTCGGACGCCAGCGTCACGGCCCGGCGAGCTTCTCTTTCAGATGAGGCGGTC  
ATACTGGCGTCCAGCTGCCCCGAAAAGGCGGGCGGGAGGAGGGTTTTCAAGGAGAC  
CAGGCACCCGTTTTATAGGGGTGTGAGGAGGAGGAACAACAACAAGTGGGTGTGTG  
AGCTGAGAGAGCCCAACAACAAGAAGGCCAGGACATGGCTCGGGACTTATCCGACA  
GCTGATATGGCGGCTCGTGCCCATGATGTGCTGCATTGGCGTTTAGGGGGAAGCTTG  
CCTGCCTCAACTTTGCTGACTCGGCTTGGCCGCTGCCCGTGCCGGCCTCCACCGATGC  
CGCGGGGATTAGGAGGGCGGCCACCGAGGCGGTTGAAGCGTTTAGGCAGGCGGAGG  
ATGGTGGTGTATGAGAAGGAGAGTAAGGCGGTGGTGTGAGCGAGGAGAAGGTTGTG  
TAGAAATGGAGGGAAGCAGCAACTTTTTTTIATTTGGACGAGGAGGAATATTTGAGAT  
GCCAAGGTTGCTTGATGACATGGCTGAAGGGCTTATGCTTTGTCCACCTCAATGTTTAG  
ATGGCCACATGGATTGGAATGACGTGGAAACTGATGATGATTTGAAACTGTGGAGTTT  
TTCTATTGA

> PmCBF3

ATGGCTGCTCGTGCCCATGACGTGGCGGCATTGGCGTTTAGAGGGAAGCTTGCCTGCA  
TCAATTTGCTGATTCCGCGTGGAGGCTGCCTGTGCCGGCTTCCATGGATAACCATGGAT  
ATTCGGAGAGCTGCCGCGGAAGCAGCTGAGGGTTTTAGGCCGGCGGAGTTTGGTGGGA  
TTGTGCAGCGGCAGCAGTGATGAGAAGGAGAGAATGGTGGTGCAGGTGGAAGAGAA



AAACAAGAAGGGTAGTGTGAACTTGGAAAGAAGCAGAAGCTTGAGTTTGCCTATTG  
GGATGAGGAGGAAGTGTGACATGCCAGGTTGCTTCATGACATGGCTGAAGGGCTT  
CTTCTTCTCCATCGCAATGCTTAGGTGGCTACATGAATTTGGATGACATGGGAACCGA  
TGCTGATGTCAAATTGTGGAATTTCTCCATTAA

> PmCBF4

ATGGACGTGTCTGAACTTCCGACTCGGTCGACCAGCCCGAGTCGAGTTCTTTGTCCG  
ACGCCAGCGTCACGACTCGGGGGCCTTCTTTGTCCGACGGGGAAGTCATATTGGCGTC  
AAGCCGGCCGAAGAAGCGAGCCGGGAGGAGGGTTTTCAAGGAGACGAGGCACCCG  
GTTTATAGGGGTGTGAGGAGGAGGAACAATGACAAGTGGGTTTGTGAAATGAGAGAG  
CCCAACAAGAAGAAGTCCAGGATATGGCTCGGGACTTATCCGACGGCTGAGATGGCT  
GCTCGTGCCCATGACGTGGCGGCATTGGCGTTTAGAGGGAAGCATGCCTGCCTCAACT  
TTGCTGACTCCGCGTGGAGGCTGCCAGTGCCGGCTTCCATGGATCCCATGGATATTG  
AAGGGCGGCCGCGGAGGCAGCTGAGGGGTTTAGGCCGGCGGAGTTTGGTGGATTGTG  
CAACGGCAGCAGTGATGAGAAGGAGAGAATGGTGGTGCAGGTGGAAGAGGAGAAC  
AAGAAGGGTAGTGTGAACTTGGAAAGAAGCAGAAGCTTGAGCTTGCCTATTGGGAT  
GAGGAGGAAGCGTTTACATGCCAGGTTGCTTCATGACATGGCTGAAGGGCTTCTTC  
TTTCTCCACCGCAACCCTTAGGCAGCGACACGAATTTGGATGACATGGGTACCGATGC  
TGATATCAAATTGTGGAGTTTCTCCATTAA

> PmCBF5

ATGGACACGATCTTCTCTCAGCTTTCTGACTCGGCGCACCAGCCCAAGTCGAGTTCGT  
CATCCGACGCAAGCGTGACCACCCTACGCACTTCGGACGTCATACTGGCGTCGAGCA  
GGCCGAAGAAGCGCGCGGAAGGAGGGTTTTCAAAGAGACGAGGCATCCGGTTTAT  
AGGGGTGTAAGGAGTAGGGACAACAACAAGTGGGTGTGTGAGTTGAGACAGCCCAA  
CAAGAAGAAGTCCGGGATTGGCTCGGGACCTATCCTACGGCTGAGATGGCTGCTCGT  
GCCCATGACGTGGCGGCATTGGCTTTTAAAGGGAAGCTTGCCTGCCTCAACTTTGCTG  
ACTCCGGTTGGAGGCTGCCGGTGGCGGCATCCATGGACTCCACGGATATCCAGAGGG  
CAGCTGCGGAGGCCGCTGAAGGGTTCAGGCCAGTGGAGTTCGGTGGAGTTTTACGCG  
ACAGCAGTGATGAGAAGGAGAGAACGTTGTGGTGAAGAGAAGAAGAAGAAGCA  
GGCTATTGTGGATATGGGAAAAAGCTGCGGCAGATTAAACTTGTTTTATTCGGATGAGG  
AGGAAATGTTTGATATGCCAAGGTTGATTGACAACATGGCTGAAGGGCTTCTTCTTCT  
CCACCGCAATGCTTAGCTGGCTACTTGAATTGGGATGACATGGAACTGAAGCTGATC  
CCAAGTTGTGGAGTTTCTCTATCTGA

> PmCBF6

ATGGCTGCTCGTGCCCATGACGTGGCGGCATTGGCTTTTAAAGGGAAGCTTGCCTGCC

TCAACTTTGCTGACTCCGGTTGGAGGCTGCCGGTGGCGGCATCCATGGACTCCACGGA  
TATCCAGAGGGCAGCTGCGGAGGCCGCTGAAGGGTTCAGGCCAGTGGAGTTCGGTGG  
AGTTTTCAGCGACAGCAGTGATGAGAAGGAGAGAACGGTTGTGGTGAAGAGAAGA  
AGAAGAAGCAGGCTATTGTGGATATGGGAAAAAGCTGCGGCAGATTAACTTGTTTTA  
TTCGGATGAGGAGGAAATGTTTGATATGCCAAGGTTGATTGACAACATGGCTGAAGGG  
CTTCTTCTTCTCCACCGCAATGCTTAGCTGGCTACTTGAATTGGGATGACATGGAAAC  
TGAAGCTGATCCCAAGTTGTGGAGTTTCTCTATCTGA

>PmDAM1

ATGAAAATGATGAGGGAGAAGATCAAGATCAAGAAGATTGACAACCTGCCTGCAAG  
GCAAGTGACCTTCTCAAAGAGGAGGAGAGGGATCTTCAAGAAAGCTGCAGAGTTAT  
CTGTTCTGTGTGAATCTGAGGTGGCAGTTGTCATCTTTTCTGCTACTGGCAAGCTTTTT  
GATTATTCAAGCTCAAGTATGAAGGATGTTATTGAAAGGTACCAAGCGCACATAAAT  
GGTGGTGA AAAATTTAACGAACGGTCTATTGAGTTGCAGCCAGAGTATGAAAACCAC  
ATCAGATTGAGCAAGGAACCTAAGGAGAAGAGCCGCCAGCTGAGGCAGATGAAAGG  
AGAGGATCTTGAAGAGCTGAATTTTGATGAGTTGCAGAAGTTAGAACAACCTGGTGA  
TGCAAGCCTTGGCCGTGTGATTGAAACTAAGGACGAACGGATTATGAGTGAGATTAT  
GGCACTTGAAAAGAAAGAGAGCTGAGCTTGTA AAAAGCCAACAACAGCTAAGGCAGA  
GGATGTTATTCAAGAGGAAATATTGGACCTGAGCTTATGAAGCCGGAGAGGTTGAATA  
ATAATTTTGGTGGTGGAGGAGAAGAAGAAGGTATGTCATCTGAATCTGCTACCTCCA  
CCACCTGCAACAGTGCTCCGAGTCTCTCTTGAAGATGACTCCGACGACGTCACTTT  
ATCTCTCAAACCTGGGGCTTCCATAA

>PmDAM2

ATGGTGAAGACGATGAGGAAGAAGATCAAGATCAAGAAGATTGACTACTTGCCTGC  
AAGGCAGGTGACCTTCTCAAAGAGGAGGAGAGGGATCTTCAAAAAGCTGAGGAGC  
TATCTGTTCTGTGTGAATCTGAGGTGGCAGTTGTCATCTTTTCTGCTACTGGCAAGCTT  
TTTGATTATTCAAGCTCAAGTACAAAGAATGTTGTTGAAAGGTATAAAGCGCACACA  
AATGGTGTGCAAAAATCGGACGAACTGTCTGTTGAGCTGCAGCTAGAAATTGAAAAC  
CAGATCAGATTGAACAAGGAACCTGCCGAGAAGAGCCGCCAGCTGAGGCAGATGAG  
AGGAGAGGATCTTGAAGAGCTGAATATTGATGAGTTGCAGAAGTTAGAACAACCTGGT  
GGAGGCAAGCCTTGGCCGTGTGATTGAAACTAAGGAAGAACTGATTATGAGTGAGAT  
TATGGCACTTGAAAGAAAGGGAGCTGAGCTGGTAGAAGCCAACAACCAGCTACGGC  
AGAGGATGGTGTGTTATCCAGAGGAAATATTGGACCTGGGCTTACGGAGCCGGAGA  
GGTTCATTAATAATATTGGAGATGGAGGAGAAGAAGGCATGTCATCTGAATCTGCCA  
CAAATGCAACCATCAGCAGCTGCAGCAGTGGTCTCAGTCTCTCTTGAAGATGACTG  
CTCAGACGTCACTTTAGCTCTCAAACCTGGGGCTTCCCTAA

>PmDAM3

ATGATGAGGAAGAAGATCAAGATCAAGAAGATTGATTGCTTGCCTGCAAGGCAGGT  
GACTTTCTCAAAGAGGAGAAGAGGGATCTTCAAGAAAGCTGCAGAGCTATCTGTTCT  
GTGTGAATCTAAGGTGGCAGTTGTCATATTTTCTGCTACTGGCAAGCTTTTTGATTATT  
CAAGCTCAAGTATCAAGGATGTTATTGAAAGCTACAAAGCGCACAAAATGGTGTCA  
AAAAATCGGACGAACCGTCTGTTGAGCTACAGCTAGAGAATGAAAATCACATCGGA  
TTGAGCAAGGAACCTGGAGGAGAAGAGCCATCAGCTGAGGCAGATGAAAGCAGAGG

ATCTTGACGAGCTGAATTTTGATGAGTTGCAGAAGTTAGAACAACCTGGTGGACACAA  
GCCTTAGCCGTGTGATTGAAACAAAGGAAGAAGCTGAGAATGAGTGAGATTATGGCA  
CTTGAAAGAAAGGGAGCTGAGCTGGTAGAAGCCAACAACCAGCTAAAGCAGACGAT  
GGTGATGTTATCCGGAGGAAATACTGGACCTACGCTTATGGATCCGGAGAGGTTGAA  
TGATAATGTCGGAGGTGGAGGAGAAGAAGAAGGCATGTCATCTGAATCTGCTATCTC  
CACCACCTGCAACAGTGCTCTCAGTCTCTCCATTGGAGATGACTCCGACGACGTCACT  
TTATCTCTCGAACTGGGGCTTCCTTAA

>PmDAM4

ATGATGAGGAAGAAGATCAAGATCAAGAAGATTGACTACCTGCCAGCAAGGCAGGT  
GACATTCTCAAAGAGGAGAAGAGGGATCTTCAAGAAAGCTGCAGAGCTATCTGTTCT  
GTGTGAATCTGAGGTGGCAGTTGTCATCTTTTCTGCTACTGGCAAGCTTTTTGATTATT  
CAAGCTCAAGTATCAAGGATGTTATTGAAAGGTACAAAGCGCGCACAAATGGTGTCTG  
AAAAATCGGATGAACAGTCTTTGAGCTGCAGCTGGAGAATGAAAACCGCATCAAA  
CTCAGTACGGAACCTCGAGGAGAAGAACCGCCAGCTGAGGCGGATGAAAGGTGAGGA  
TCTTGAAGAGCTGGATCTGGATGAGTTGCTGAAGTTGGAACAACCTGGTGGAAAGCAAC  
CCTTGTCCGTGTGATGGAAACTAAGGAAGAAGTACTGATTATGAGTGATATTGTGGCACTT  
GATAAAAAGGGAACCTGAGCTGGTAGAAGGCAACAATCAGATGGTGATGTTAAGGGA  
CAGGATGGTGATGTTATCCAAAAGAAGTACCGGACCTGCGCTTATGGAGCCATCTGA  
CTCTGCTACCTCCACCAGCTGCAACAGTGCTCTGAGTCTTTCTTTGAAGATGAATGCT  
CCGACGACGCCATTTTATCTCTCGAACTGGGGCGTTCCTAA

>PmDAM5

ATGATGAATAAGATCAAGATCAAGAAGATTGACTACTTGCCTGCAAGGCAGGTGACC  
TTCTCAAAAAGGAGAAGAGGGCTCTTCAAGAAAGCTGCAGAGCTATCTGTTCTGTGT  
GAATCTGAGGTGGCAGTTGTCATCTTTTCTGCCACTGGCAAGCTTTTTGATTATTCAAG  
CTCAAGTACCAAGGATGTTATTGAAAGGTACAACGCAGACATGAATGGTGTCTGAAA  
AATCGAACAATCAAGAGATTGAGCTGCAGCTGGAGAATGAAAACCATCAAACTG  
AGTAAGGAACCTCGAGAAGACGAGCCACCAGCTGAGGCAGATGAAAGGTGAGGATCT  
TGAAGGGCTGAATCTGGATGAGTTGCTGAAGTTGGAACAACCTGGTGGAAAGCAAGCCT  
TGGCCGTGTCATGGAAACTAAGGAAGAGCTGATTAAGAGTGAGATTATGGAACCTCGA  
AAGAAAGGGAGCTGAGCTAGTTGAAGCCAACAGCCAGCTAAGGCAGACGATGGTGA  
TGTTATCCGGAGGAAATACTGGACCTGCGCTTATGGATCCGGAGAGGCTGAATAATA  
ATATTGAAGGTGGAGGAGAAGAAGAAGGCATGTCAGCTGAATCTGCTATCTCCACCA  
CCTGCAACAGTGCTGTCAGTCTCTCTTTGAAGATGACTCCTCCGATGAGGTCACTTT  
GTCTCTCAAACCTGGGGCGTTAA

>PmDAM6

ATGGTGAAAATGATGAGGGAGAAGATCAAGATCAAGAAGATTGACTACCTGCCAGC  
AAGGCAGGTTACCTTTTCAAAGAGAAGAAGAGGGCTCTTCAAGAAAGCTGCAGAGC  
TATCGGTTCTGTGTGAATCTGAGGTGGCTGTCGTCATCTTTTCTGCCACTGACAAGCTC  
TTTCATTATTCAAGCTCAAGTACCGAGGATGTTATTGAAAGGTACAAAGCGCACACA  
GGTGGTGCCGAAAATCAGACAAACAGTTTCTTGAGCTGCAACTGGAGAATGAAAA  
CAACATCAAACCTGAGTAAGGAACCTCGAGGAGAAGAGCCGCCAGCTGAGGCAGATGA  
AAGGTGAGGATCTTGAAGGGCTGAATCTGGATGAGCTGCTGAAGTTAGAACAAGTGG

TGGAAGCAAGCCTTGGCCGTGTGATAGAACTAAGGAAGAGCTGATTATGAGTGCGA  
TTATGGCACTGGAGAAAAAGGGAGCTGAGCTGGTAGAAACCAACAACCAGTTAAGG  
CATAGGATGGTGTATCCGGAGGAAATACTGGACCTGCGTTTGTGGAGCCGGAG  
ACGTTGATTACTAATGTTGGAGGTGGAGGACGAGAAGACGACATGTCATCTGAATCT  
GCCGTAATTGCCACCTCCACCAGCTGCAACAGTGCTTTCAGTCTCTCTCTTGAAGATG  
ACTGCTCCGATGTCACCTTTATCTCTCAAACCTGGGGCTTCCCTAG

**Supplementary Data S3.** The proteins sequences of CBF genes.

>PmCBF1

MHRFLSHFSDSVDQPDSSSLSDASVTTLRTSWSEDEVILASSRPPKRRAGRRVFKETRHPVYR  
GVRRRNNDKWVCEMREPKKTKSRIWLGTYPTEAEMAARAHDVAALAFRGKLAACLNFAADS  
AWRLPVPASMDAMDIRRAASEAAEGFRPVEFGGVSSSSSDEKESMVVQVEEKKKKGSVNM  
ERSRSLSLSYWDEEEVLDMPRMLDHMAQGLLLSPPQCLGGYIWDMDGTDADVELWSFSN\*

>PmCBF2

MDMIYSQVSDLASLENPKSSFSASVTARRASLSDEAVILASSCPKRRAGRRVFKETRHPV  
YRGVRRRNNDKWVCELREPNNKKARTWLGTYPTEAEMAARAHDVAALAFRGKLAACLNFA  
ADSAWPLPVPASTDAAGIRRAATEAVEAFRQAEDGGVYEKESKAVVSEEKGCVEMEGSSN  
FFYLDDEEEIFEMPRLDDMAEGLMLCPPQCLDGHMDWNDVETDDDLKLWSFSI\*

>PmCBF3

MAARAHDVAALAFRGKLACINFADSAWRLPVPASMDTMDIRRAAAEAAEGFRPAEFGG  
LCSGSSDEKERMVVQVEEKNKKGSVNLERSRSLSLSYWDEEEVFDMPRLLHDMAEGLLLSP  
SQCLGGYMNLDMDGTDADVKLWNFSI\*

>PmCBF4

MDVSELSDSVDQPESSSLSDASVTTRGPSLSDGEVILASSRPPKRRAGRRVFKETRHPVYRGVR  
RRNNDKWVCEMREPNNKKKSRIWLGTYPTEAEMAARAHDVAALAFRGKHAACLNFAADSAW  
RLPVPASMDPMDIRRAAAEAAEGFRPAEFGGLCNGSSDEKERMVVQVEEENKKGSVNLER  
SRSLSLSYWDEEEAFDMPRLLHDMAEGLLLSPPQPLGSDTNLDMDGTDADIKLWSFSI\*

>PmCBF5

MDTIFSQLSDSADQPKSSSSSDASVTTLRTSDVILASSRPPKRRAGRRVFKETRHPVYRGVRSR  
DNNKWVCELRQPNKKKSGIWLGTYPTEAEMAARAHDVAALAFKGLACLNFAADSGWRL  
PVAASMDSTDIQRAAAEAAEGFRPVEFGGVFSDSSDEKERTVVVEEKKKKQAIVDMGKSC  
GRLNLFYSDEEEMFDMPRLLIDNMAEGLLLSPPQCLAGYLNWDDMETEADPKLWSFSI\*

>PmCBF6

MAARAHDVAALAFKGLACLNFAADSGWRLPVAASMDSTDIQRAAAEAAEGFRPVEFGG  
VFSDSSDEKERTVVVEEKKKKQAIVDMGKSCGRLNLFYSDEEEMFDMPRLLIDNMAEGLLLS  
PPQCLAGYLNWDDMETEADPKLWSFSI\*

>PpCBF1

MVMDMIFAQVSDSADQPRSSSSSDASVSTLRTSDVILASSPCKRAGRKVFKETRHPVYRGV  
RRRDNNKWVCELRQPNKKKSGIWLGTYPTEAEMAARAHDVAALAFKGLACLNFAADSG  
WRLPVAASMDSMIDIQRAAAEAAEGFRPVEFGGVSSGSSDEKERMVVVEEKKKKQAIVDM  
GKSCSRLNLFYLDDEEEMFDMPRLLIDNMAEGLLLSPPQCLAGYLNWDDMETEADSKLWSFS

I\*

>PpCBF2

MDMFSQAQLSDSPDQPESSFSASVTTLPASSSDENVILASSRPKKRAGR RVFKETRHPVYRG  
VRRRN NNK WVC ELREP NNK SRIW LGTYPTAEMA ARAHDVAALAFRGK LACINFADSA  
WRLPLPASMDTMDIRRAAAEAAEGFRPAEFGGLSSGSSDEKEMNLSVDM EKNSLCLFY L  
DEEEMFDM PRLIDNMAQGLLLSPPQCSAGYLNWDDVETEADAKLWSFSI\*

>PpCBF3

MDLSQLSDPVDQPESSSLSDASVTTQGPSWSDGDVILASSLPKKRAGR RVFKETRHPVYRGV  
RRRNNDK WVC EMREP NNK SRIW LGTYPTAEMA ARAHDVAALAFRGK LACINFADSAW  
RLPLPASMDTMDIRRAAAEAAERFRPAEFGGMCSGSSDEKERMVVQVEEEDK KGSVNLER  
SLSLSCWDEEEAFDM PRLLDHMAEGLLLSPPQLGSDMNLD DMGTDADIKLWSFSI\*

>PpCBF4

MDLIYSQVSDLASLENPDTSSFWNASVTARRASLSVEEVILASSCPKRRAGR RVFKETRHPV  
YRGVRRRNNDK WVC ELRDP NNK KARIW LGTYPKAEMA ARAHDVAALAFRGK LACLN F  
ADSAWRLPVPASNDAAEIRRV ANEAAEAFRKAEDGGVDEKESKGVVNEEK GCVEMEGSS  
NLFYLDEEEIFEM PRLDDMAEGLMLCPPQCLDGYMDWNDVGTDDDLK LWSFTI\*

>PpCBF5

MNRFFSHFSDSVDQPESSSLSDATVTTLRASWSDVDVILASSRPKKRAGR RVFKETRHPVYR  
GVRRRNNDK WVC EMREP KTKSRIW LGTYPTAEMA ARAHDVAALAFRGK LACLNFPDS  
AWRLPVPASMDAMDIRRAAAEAAEGFRPVEFGGVSSSSSDEKERMVVQVEEKKKKKDSV  
KMEKSRSLSYWDEEEVFDMPRLDDMAQGLLLTPPQCLGGDIWDDMGTDADVKLWSF  
SN

\*

>PpDREB2C

MGAYDQGSNEVALTLDSTRKRKTRSR RDGTSVAETLEKWKEYNKQLESDNNEGKTRKVP  
AKGSKKGC MKGKGGPDNSRCNYRGVRQRTWGWVAEIREPNRGSRLWLGTFPTALDAA  
LAYDEAAKAMYGPAARLNLPV ANYSSWKESQETSSATTPSGSSAVATPGCSGSTSSSNH  
SEVCADEDSKGF LDVKTENGEGESAIHAWSN AVNQALVKEETKDEFTEGYFHNDQPAVK  
PEAYVGDFNWAGGQYTG DYLENFTEEEVFDVDELLSPLDDTPVRNPEPEQSLGSDVDAKL  
LGSLNHMEQGPSGGEYNFD FLKRDDVTGEDDQGYYNLGLSDLGLGDFTGGTMQPEDGSY  
NFSMDM\*

>PdCBF

MVMDMIFAQVSDSADQPRSSSSSDASVTTLRTSDVILASSSPKKRAGR RVFKETRHPVYRGV  
RRRDNNK WVC ELRQP NNK KSGIWL GTYPTAEMA ARAHDVAALAFK GK LACLN FADSG  
WRLPVAASMDSM DIQR AAEAAEAGFRPVEFGGVSSGSSDEKERMVVVEEKKKKQAI VDM  
GKSCSRLNLFYLDEEEMFDM PRLIDNMAEGLLLSPPQCLAGYLNWDDMETEADPKLWSFS  
I\*

>PfCBF

MVMDMIFAQVSDSADQPRSSSSSDASVSTLRTSDVILASSSPKKRAGR KVF KETRHPVYRGV  
RRRDNNK WVC ELRQP NNK KSGIWL GTYPTAEMA ARAHDVAALAFK GK LACLN FADSG  
WRLPVAASMDSM DIQR AAEAAEAGFRPVEFGGVSSGSSDEKERMVVVEEKKKKQAI VDM  
GKSCSRLNLFYLDEEEMFDM PRLIDNMAEGLLLSPPQCLAGYLNWDDMETEADSKLWSFS  
I\*

>PaCBF

MDMFFSQLSDSVDQPQSSLLSDASVTTRGASCSDGDVILASSRPKKRAGR RVFKETRHPVYR

GVERRRNNDKWVCEMREPNNKKKSRIWLGTYPTAEMAARAHDVAALAFRGLKACINFADS  
AWRLPVPASMDTMDIRRAAAEAAEGRFPVEFGGVCSSGSSDEKERMVVQVEEKNKKGSVN  
LERSRSLSYWDEEEVFHMPRLLHDMAEGLLLSPSQCLGGYMNLDMDGTADVKLWSFS  
I

>MdCBF1

MDGCSNYVDPGESSASDTSRPMFLTLSDKEVLLASTCPKKRAGRKKFRETRHPVFRGV  
RRRNSGKWVCEVREPNNKTRIWLGTFTAEMAARAHDVAAIALRGRSACLNFADSARRL  
PVPASSNAKDIQTAATEAAEAFRPTESDEVCGSPVAAPSESTSASEQQQVFYMDEEAVFG  
MPGLLADMAEGMLLPPPHYSDDDDVDVCADVPLWSFSI

>MdCBF2

MNTIFSTQLSDSSEKPESSDDTSITAQSQLASFSDEEVILASSRPPKKRAGR RVFKETRHPVYR  
GVERRRNNDKWVCEMREPNNKKKSRIWLGTYPTAEMAARAHDVAALAFRGLKACLN FADS  
AWRLPVPASIDSVDIRRAAAEAAETFRPAEFGGVLES GDDEXESKKMEEEKDCGGVEGSGI  
LFYLDEEEMFDMRLLDSMAEGLLLSPHSSGGYMNWDDMGSNDDVSLWSFSN

>MdCBF4

MNTISRQLSDSAERPESSESVTXRSQPTSFSDEEVILASSTPKKRAGR RVFNETRHPVYRGVR  
RRNNDKWVCEMREPNNKKKSRIWLGTYPTAEMAARAHDVAALAFRGLRACLNFADSAW  
RLPVPASTDSVDIRRAAAEAAETFRPAEFGGVSESGDDEKESKKMEGEKDCGCAEQSDCG  
GAEQSDCGGAEQSGSSFYLDEEEMFAMPRLLD SMAEGLLLSPRRSAGSNMNWDDMGSN  
DDDVNLWSFSK

>MdCBF5

MDAFSHYYVDPQPESSASDANSRPMFMNLSDEEVLLASTYPKKQAGRKKFKETRHPVY  
RGVERRRNSGKWVSEVREPNNKTRIWLGTFTAEMAARAHDVAAIALRGRSACLNFADSA  
WRLPVPASANA KDIQTA AAEAAEQFRPVEESDEACGASAVAPSECTSAPEQQVHFMD EEA  
VFGMPGLLANMAEGMLLPPPHYNADDVVDVYADVPLWSFSI

>EgCBF

MNSSSYISHPNSFSFDFAEPPFSLLLSHDRSAAPGNFSGEEVRLASDHPKKPAGRKKFRETRH  
PVYRGVRLRDSGKWVCEVREPRKKSRIWLGTFPTADMAARAHDVAALALRGQSACLNF A  
DSAWRLPVPASPNTKDIQKAAAKAAEAFQ LLESEDMMSGNEKKLHSEEGVLYDEEDIFGM  
PGLLANTAEGMLLSPPECSGDLYAGLDDGNL DAYASLWSYSM\*

>HrCBF

MATLHLLCVIPHPASRRRHEPFRPKRDSSCPKKPAGRKKFRETRHPVYRGVRLRKS GKWVC  
EVREPNNKKSRIWLGFTLTA EIAARAHDVAAIALRGKSACLNFADSAWRLRIPETT CPKEIQK  
AAAEAAVAFQAE LNDTTADHGLDVEETIVEAIFTEESSEGFYMDEEFMFGMPTLWASMAE  
GMLLPPPSVQFGPNYDFDGDADVSPLEY\*

>CjCBF

MDSLSSWSSPESRVGNFSDDEDVLLASSNPKKRAGRKKFRETRHPVYRGVRRRDSGKWVC  
EVREPNNKSRVWLGTFTAEMAARAHDVAAIALRGRSACLNFADSSWRLPLPASTDPKDI  
QKAAAEAAEAFRPEKDLRRGDDKMDEEEAAERTTMSDDVFFMDEEAVFGMPGLLTNMA  
EGMLLPPPPPPQSNCCGGYEEDDVESNADVSLWSYSV

>NtDREB1

MTSFAFSELLGSEHESPVTLGEEYCPKLAAGCPKKPAGRKKFRETRHPVYRGVRLRNSGK  
WVCEVREPNNKKSRIWLGFTLTA EIAARAHDVAAIALRGKSACLNFADSAWRLRIPETT CPK  
DIQKAAAEAAVAFQAEINDTTDHD FDFVEETIVEAIFTEENNDGFYMDEEESMFGMPSLVA

SMAEGMLLPPPSVRFEHNYDFDGDADASLWSY\*

>NtDREB2

MDIFRSYSDTLTESSSENSSSRNANLSDEEVMLASNNPKKRAGRKKFRETRHATYRG  
VRKRNSDRWVCEIRQPNKKSRIWLGTYPTAEMAARAHDVAAIALRGRSACLNFADSVWK  
LHIPASADAKDIQRAAAEAAEAFGRPSESEEADSGTTPETPESSKLFMDEEALFCMPGLLAN  
MAEGLMLPPPHYVEVG DYVEAAAADMPQWSYTM\*

>NtDREB3

MEMCRSYSDPLADSSSLSDSSSNRAIRSNEEVMLASNNPKKRAGRKKFRETRHPVYRG  
VRKRNSGKWWSEVREPNKKSRIWLGTFPSAEMAARAHDVAAIALRGRSACLNFADSAWK  
LPVPASSDAKNIQKAAAEAAEAFRSSEAEENMPEYTGEDSKEVNTTPENMFYMDEEALFCM  
PGLLANMAEGLMLPPPQCSQIGDDHMEADMPLWSYSI\*

>NtDREB4

MNIFGDHNFDP LIPTLSTLLPAAESSTSSDSGSSGSTPNYSDEEVMLASNYPKKRAGRKKFR  
ETRHPVYRGIRRRNSNKWVCEVREPNKKSRIWLGTFPTAEMAARAHDVAAIALRGRSACL  
NFADSAWRLPIPTSAAKDIQKATVEAAETFRPVESHRENFKIIVDQVIQELVAELPDNVL  
FMDEEALFCMPRLVNMAEGLMLPPPQCIIDGYEMEADHADMSLWSY\*

>AtCBF1

MNSFSAFSEMFGSDYEPQGGDYCPTLATSCPCKPAGRKKFRETRHPIYRGVQRNSGKWS  
EVREPNKKTRIWLGTFTQAEMAARAHDVAAALRGRSACLNFADSAWRLRIPESTCAKDI  
QKAAAEAAALAFQDETCDTTTTNHGLDMEETMVEAIYTPEQSEGAFYMDEETMFGMPTLL  
DNMAEGMLLPPPSVQWNHNYDGEDGDVSLWSY\*

>AtCBF2

MNSFSAFSEMFGSDYESPVSSGGDYSPKLATSCPCKPAGRKKFRETRHPIYRGVQRNSGK  
WVCELREPNKKTRIWLGTFTQAEMAARAHDVAAIALRGRSACLNFADSAWRLRIPESTCA  
KEIQKAAAEAAALNFQDEMCHMTTDAHGLDMEETLVEAIYTPEQSQDAFYMDEEAMLGM  
SSLLDNMAEGMLLPPSPVQWNYNFDVEGDDDDVSLWSY\*

>AtCBF3

MNSFSAFSEMFGSDYESSVSSGGDYIPTLASSCPCKPAGRKKFRETRHPIYRGVRRRNSGKW  
VCEVREPNKKTRIWLGTFTQAEMAARAHDVAAALRGRSACLNFADSAWRLRIPESTCAK  
DIQKAAAEAAALAFQDEMCDATTDHGFDMEE TLVEAIYTAEQSENAFYMHDEAMFEMPSL  
LANMAEGMLLPLPSVQWNHNHEVDGDDDDVSLWSY\*

>AtCBF4

MNPFYSTFPDSFLSISDHRSPVSDSSECSPKLASSCPKKRAGRKKFRETRHPIYRGVQRNSG  
KWVCEVREPNKKSRIWLGTFPTVEMAARAHDVAAALRGRSACLNFADSAWRLRIPETTC  
PKEIQKAASEAAMAFQNETTTEGSKTAAEAEAAAGEGVREGERRAEEQNGGVFYMDDEA  
LLGMPNFFENMAEGMLLPPPEVGWNHNDFDGVDVSLWSFDE\*

>AtCBF5

MENDDITVAEMKPKKRAGRRIKETRHPYRGVRRRDGDKWVCEVREPIHQRRVWLGTYP  
TADMAARAHDVAVLALRGRSACLNFSDSAWRLPVPASTDPDTIRRTAAEAAEMFRPPEFS  
TGITVLP SASEFDTSDEGVAGMMMLAE EPLMSPPRS YIDMNTSVYVDEEMCYEDLSLWSY  
\*

>AtCBF6

MNNDIILAEMRPPKKRAGR RVFKETRHPVYRGIRRRNGDKWVCEVREPTHQRRRIWLGTYP  
TADMAARAHDVAVLALRGRSACLNFADSAWRLPVPESNDP DVIRRVAAEAAEMFRPVD

LESGITVLPACAGDDVDLGFSGSGSGSGSEERNSSSYGFGDYEEVSTTMMRLAEGPLMSPPR  
SYMEDMTPTNVYTEEEMCYEDMSLWSYRY\*

>VrCBF1

MDSHDHEEFSASSSSSSRTNSNPSSDLLPLQCIGHKRKAGRKKFRETRHPYRGVQRNGNK  
WVCEVREPLKKSRIWLGTFPTPEMAARAHDVAALALRGRFASLNFPDSAWRLXRPKSSSA  
EDIQVAALEATKAFNPTAPSSSSLASALDNMSGVADSKKVLETSPNVESPKLKSQRMVLEV  
SPVDTKRSEKVGDGSTPXFMDDEEAMFNMQGLINSMAEGLLLTPPAMCKGFSWDDATDSHI  
DLSLWNDD

>VrCBF2

MDLDRESSASSTSSPSRANPVSSDPRCPSRCIPHKXKTGRKKFRKTRHPYRGVQRNENKW  
VSEVREPSKKSRIWLGTFPTPEMAARAHDVAALALRGRHFASLNFPDSAWRLPRARSSSAGD  
VQFAAIQAAKAFQPPSSSSSTPFVXDNMSAGSRKILETSSVVDTPQLKSQKKVVGVSVD  
KSXEKAGDGFPTAFVDEEAVFNMPGLIDSMAEGLLLTPPAMCEGFSWDDAVSHIDL  
SLWNHDFLS

>VrCBF3

MESERDQSSPSSSSSSSQTKCSISSPVHKKRAGRKKFRETRHPVYRGVQRNGNRWVCEMR  
DPKNKSRIWLGTFPTPEMAARAHDVAALAFRGDFAALNFPDSTSRPRAKSSSAGDIRVAA  
LAAAMAFRPAAPSSSSSYISHVTACSEELETSCSEDSPQLESRKVVGVVALEDESSESPHGS  
STVFMDEEALFNMPGLINSMAEGLLLAPPTMLGGFSWDDTTSYTDLSLWNDD

>VrCBF4

MNTTSPPYSDPHPLVCNWDSLNLPSDGGSEELMLASTHPKKRAGRKKFRETRHPVYRGV  
RRRNSGKWVCEVREPNTSRIWLGTFPTAEMAARAHDVAALALRGRGACLNFA  
DSAWRLHVPSSRDAKDIQKAAAEAAEAFRPMENDGVMQDERRESEV  
RTPDNVFMDEEDVFGMPGLLVNMAEGLLMPPPHSVADGYGGDDMAADADMSLWSYSI

>PtCBF1

MLASRNPKKAGRKKFRETRHPVYRGVRRRNSGKWVCEVREPNTSRIWLGTFPTAEMA  
ARAHDVAALALRGRSACLNFA  
DSAWRLPVPASSEAKDIQKAAAEAAEAGGFRPEGC  
VGGELMRTGDEGEKAAETAEAGEEVFYMDDEAVFGMPGLLANMAEGLMPPPHCGGGGD  
WV  
DNMENIDADMPLWSFSI

>PtCBF2

MDVFCYSYDQNPIGSMSLLSVLDEQECSYSSVLSDSSTSSVTKGVQPGAIFSDEEVILASRNP  
KKRAGRKKFRETRHPVYRGVRRRNSGKWVCEVREPNTSRIWLGTFPTADMAARAHDV  
AALALRGRSACLNFA  
DSAWRLPTPASSDAKDIQKAAAEAAEAFRPEGLG  
VELTRTGDEV  
EKVAGTAAGDVFYMDDDADFGMPGLLANIAEGLMPPPNCCGYSGGDSLDNMENNDT  
DMSLWSFSV

>PtCBF3

MVMGGSNSFSPDKQESSLSSLLSDSSGSQDSSPSSNEKVLLATSRPKKAGRRI  
FKETRHPYRGVQRNGDKWVCELREPNTSRIWLGTYPTPEMAARAHDVAALAFRGSACLNFA  
DSAWRLPVPISNEAKDIRRAASEAAELFRTSDLGGQVMEDFRREDRGEVCSSTND  
DIRDLPSENV  
GYIDEEAEFNMPGLLASMAEGLLLSPPHYTGDWWDGEIDADWSLWSS

>PtCBF5

MEFENHSPSISLRQNLSCPCNNPINYIYNLQQAQERPVTVLKKKKAGRKKFKETRHPY  
RGVQRNGDKWVCEVREPNTSRIWLGTFPTPEMAARAHDVAALALKGETATLNFPDSA  
LILPRAKSSSAGDIRRAARDAVEAFIPASLCSPPSPSHHKNFSCVTSSSKVLSPALSDLN  
PHE



KGIENVFKPSLIGMQGVEVYGKKALNDDPFSMVMMSCPNNCSEKVSHQPNALFFDEEALF  
NMPGLLD SMAEGLILTPPVMQRGFNWDDMACSTD LTLWEED

>PtCBF6

MCLLCPTYVTSCFMKNKAGRKKFKETRHPVYRGVRRRNGNKWVCEVREP NKKSRIWVGT  
FKSPEMAARAHDVAALALKGEL AALNFLDSALILPRAKSSSARDIQRAALAATEVLGRSAS  
SCSSSSPDHKKLSCVPNHSNATFFDEEALFNMPGLLD SMAEGLILTPPAMARGVYWDDM  
ACSTD LTLWEDDYLDSQ
